# Supplementary material
Source: MDPI journal article supplement (https://www.mdpi.com/2304-6740/10/7/98)
Supplement: s1 [file s1]

# Investigations on the Spin States of Two Mononuclear Iron(II) Complexes Based on N-Donor Tridentate Schiff Base Ligands Derived from Pyridine-2,6-Dicarboxaldehyde

Yosef Bayeh <sup>1,2</sup>, Nithin Suryadevara <sup>3</sup>, Sören Schlittenhardt <sup>4</sup>, Róbert Gyepes <sup>5</sup>, Assefa Sergawie <sup>1</sup>, Peter Hrobárik <sup>2,\*</sup>, Wolfgang Linert <sup>6</sup>, Mario Ruben <sup>3,4,7,\*</sup> and Madhu Thomas <sup>1,\*</sup>

<sup>1</sup> Department of Industrial Chemistry, College of Applied Sciences and Nanotechnology Center of Excellence, Addis Ababa Science and Technology University, Addis Ababa P.O. Box 16417, Ethiopia; yosef.bayeh@aastu.edu.et (Y.B.); assefa.sergawie@aastu.edu.et (A.S.)

<sup>2</sup> Department of Inorganic Chemistry, Faculty of Natural Sciences, Comenius University, Mlynská dolina CH-2, Ilkovičova 6, 84215 Bratislava, Slovakia

<sup>3</sup> Institute of Quantum Materials and Technologies, Karlsruhe Institute of Technology, Hermann-von-Helmholtz-Platz 1, 76344 Karlsruhe, Germany; nithin.suryadevara@kit.edu

<sup>4</sup> Institute of Nanotechnology, Karlsruhe Institute of Technology, Hermann-von-Helmholtz-Platz 1, 76344 Karlsruhe, Germany; soeren.schlittenhardt@kit.edu

<sup>5</sup> Department of Inorganic Chemistry, Faculty of Science, Charles University in Prague, Hlavova 2030/8, 12843 Prague, Czech Republic; gyepes@natur.cuni.cz

<sup>6</sup> Institute of Applied Physics, Vienna University of Technology, Wiedner Hauptstraße 8-10, 1040 Vienna, Austria; wolfgang.linert@tuwien.ac.at

<sup>7</sup> Centre Européen de Science Quantique (CESQ), Institut de Science et d'Ingénierie Supramoléculaires (ISIS, UMR 7006), CNRS-Université de Strasbourg, 8 Allée Gaspard Monge, BP 70028, CEDEX, 67083 Strasbourg, France

\* Correspondence: peter.hrobarik@uniba.sk (P.H.); mario.ruben@kit.edu (M.R.); madhu.thomas@aastu.edu.et (M.T.)

## Supplementary Information

**Table S1.** Experimental and computed  $^1\text{H}$  NMR shifts (in ppm vs. TMS) in free ligands  $\text{L}^1$ ,  $\text{L}^2$  and corresponding  $[\text{Fe}(\text{L}^1)_2]^{2+}$  and  $[\text{Fe}(\text{L}^2)_2]^{2+}$  complexes (all in  $\text{CD}_3\text{CN}$ ) <sup>a</sup>

|                                                   | H-imine | py-3,5 | py-4 | CH <sub>2</sub> | H-2 / H-6 | H-3 / H-5 | H-4  |      |
|---------------------------------------------------|---------|--------|------|-----------------|-----------|-----------|------|------|
| L <sup>1</sup>                                    |         |        |      |                 |           |           |      |      |
| Expt.                                             | 8.42    | 7.97   | 7.79 | 4.79            | 7.30      | 7.29      | 7.21 |      |
| Calcd.                                            | 8.32    | 8.13   | 7.55 | 4.61            | 6.86      | 7.03      | 6.94 |      |
| [Fe(L <sup>1</sup> ) <sub>2</sub> ] <sup>2+</sup> |         |        |      |                 |           |           |      |      |
| Expt.                                             | 7.73    | 8.13   | 8.38 | 3.68            | 6.47      | 7.16      | 7.29 |      |
| Calcd.                                            | 7.10    | 7.74   | 7.90 | 3.45            | 6.00      | 6.94      | 7.00 |      |
|                                                   | H-imine | py-3,5 | py-4 | CH <sub>2</sub> | H-2       | H-4       | H-5  | H-6  |
| L <sup>2</sup>                                    |         |        |      |                 |           |           |      |      |
| Expt.                                             | 8.43    | 8.00   | 7.81 | 4.77            | 7.34      | 7.25      | 7.25 | 7.25 |
| Calcd.                                            | 8.30    | 8.13   | 7.56 | 4.56            | 7.00      | 6.87      | 6.95 | 6.77 |
| [Fe(L <sup>2</sup> ) <sub>2</sub> ] <sup>2+</sup> |         |        |      |                 |           |           |      |      |
| Expt.                                             | 7.84    | 8.23   | 8.50 | 3.74            | 6.48      | 7.17      | 7.33 | 6.48 |
| Calcd.                                            | 7.23    | 7.67   | 8.06 | 3.50            | 5.98      | 6.97      | 6.82 | 6.17 |

<sup>a</sup> Calculations done at the TPSSh-D3(BJ)/def2-TZVP/PCM( $\text{CH}_3\text{CN}$ ) level.

**Table S2.** Experimental and computed  $^{13}\text{C}$  NMR shifts (in ppm vs. TMS) in free ligands  $\text{L}^1$ ,  $\text{L}^2$  and corresponding  $[\text{Fe}(\text{L}^1)_2]^{2+}$  and  $[\text{Fe}(\text{L}^2)_2]^{2+}$  complexes (all in  $\text{CD}_3\text{CN}$ ) <sup>a</sup>

|                                                    | C-imine | py-2,6 | py-3,5 | py-4  | CH <sub>2</sub> | C-1   | C-2/C-6 | C-3/C-5 | C-4   |       |       |
|----------------------------------------------------|---------|--------|--------|-------|-----------------|-------|---------|---------|-------|-------|-------|
| <b><math>\text{L}^1</math></b>                     |         |        |        |       |                 |       |         |         |       |       |       |
| <b>Expt.</b>                                       | 162.4   | 154.6  | 121.8  | 137.5 | 64.3            | 139.3 | 128.5   | 128.2   | 127.1 |       |       |
| <b>Calcd.</b>                                      | 166.9   | 154.9  | 122.2  | 135.9 | 67.0            | 142.0 | 125.4   | 126.8   | 124.9 |       |       |
| <b><math>[\text{Fe}(\text{L}^1)_2]^{2+}</math></b> |         |        |        |       |                 |       |         |         |       |       |       |
| <b>Expt.</b>                                       | 170.1   | 160.3  | 128.5  | 137.4 | 62.4            | 133.3 | 128.7   | 129.3   | 129.3 |       |       |
| <b>Calcd.</b>                                      | 167.7   | 157.4  | 128.7  | 136.3 | 65.6            | 133.4 | 127.3   | 128.2   | 128.6 |       |       |
|                                                    | C-imine | py-2,6 | py-3,5 | py-4  | CH <sub>2</sub> | C-1   | C-2     | C-3     | C-4   | C-5   | C-6   |
| <b><math>\text{L}^2</math></b>                     |         |        |        |       |                 |       |         |         |       |       |       |
| <b>Expt.</b>                                       | 163.0   | 154.4  | 122.0  | 133.8 | 63.4            | 141.8 | 128.0   | 137.6   | 127.0 | 130.1 | 126.6 |
| <b>Calcd.</b>                                      | 167.1   | 154.8  | 122.4  | 136.0 | 66.3            | 144.5 | 126.4   | 139.9   | 125.7 | 128.5 | 123.2 |
| <b><math>[\text{Fe}(\text{L}^2)_2]^{2+}</math></b> |         |        |        |       |                 |       |         |         |       |       |       |
| <b>Expt.</b>                                       | 171.1   | 160.4  | 128.6  | 135.5 | 61.8            | 134.5 | 128.7   | 137.8   | 130.9 | 129.6 | 127.3 |
| <b>Calcd.</b>                                      | 167.4   | 157.3  | 128.7  | 137.6 | 65.1            | 135.1 | 128.8   | 140.3   | 129.8 | 125.7 | 125.7 |

<sup>a</sup> Calculations done at the TPSSh-D3(BJ)/def2-TZVP/PCM ( $\text{CH}_3\text{CN}$ ) level.

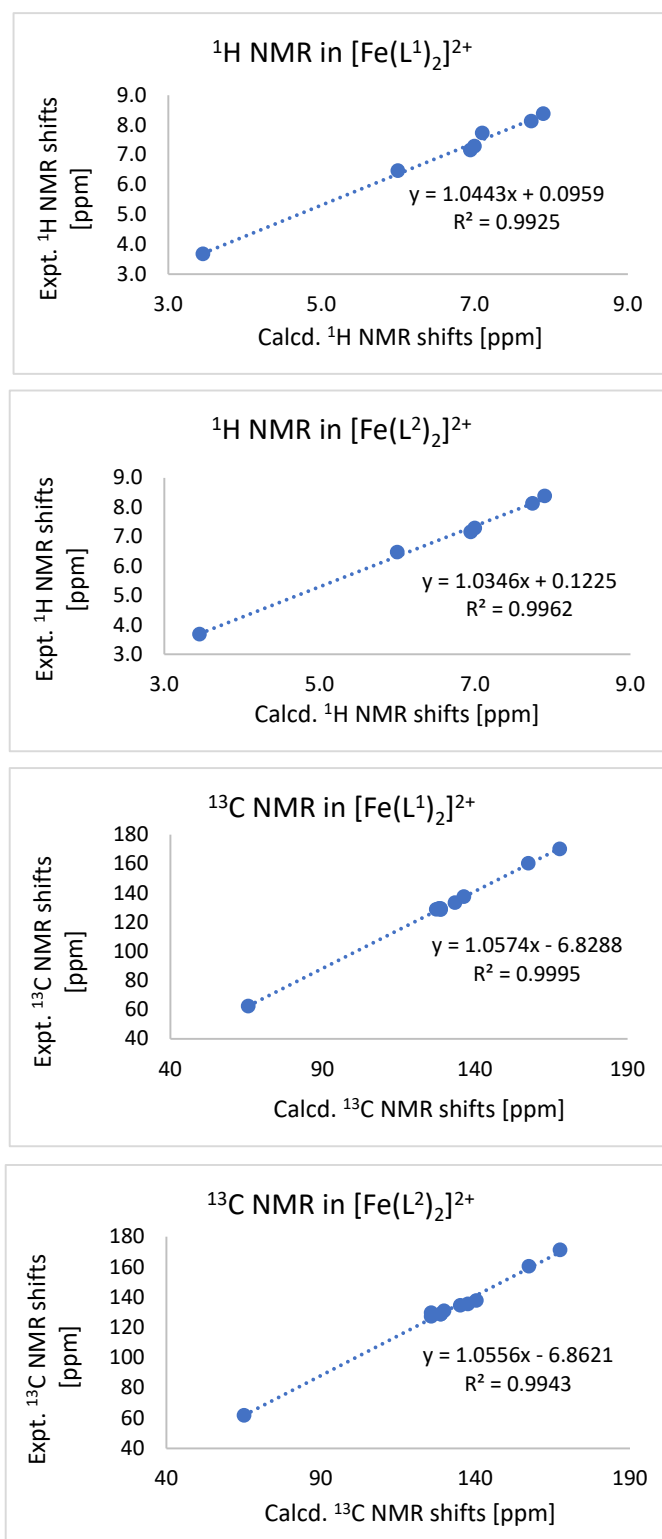

**Figure S1.** Comparison of calculated and experimental NMR shifts in  $[\text{FeL}_2]^{2+}$  ( $S=0$ ) complexes (cf. Tables S1 and S2 for numeric data)

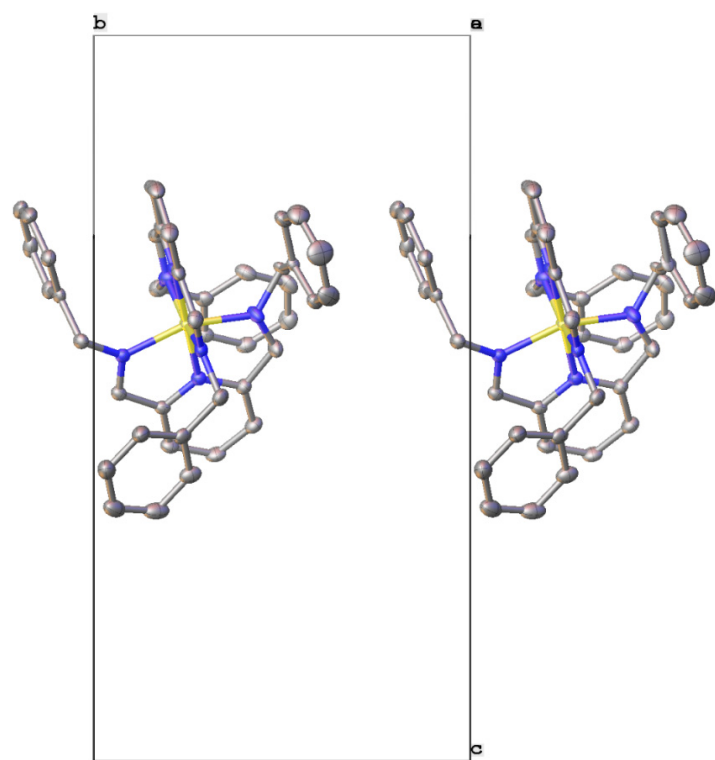

(a)

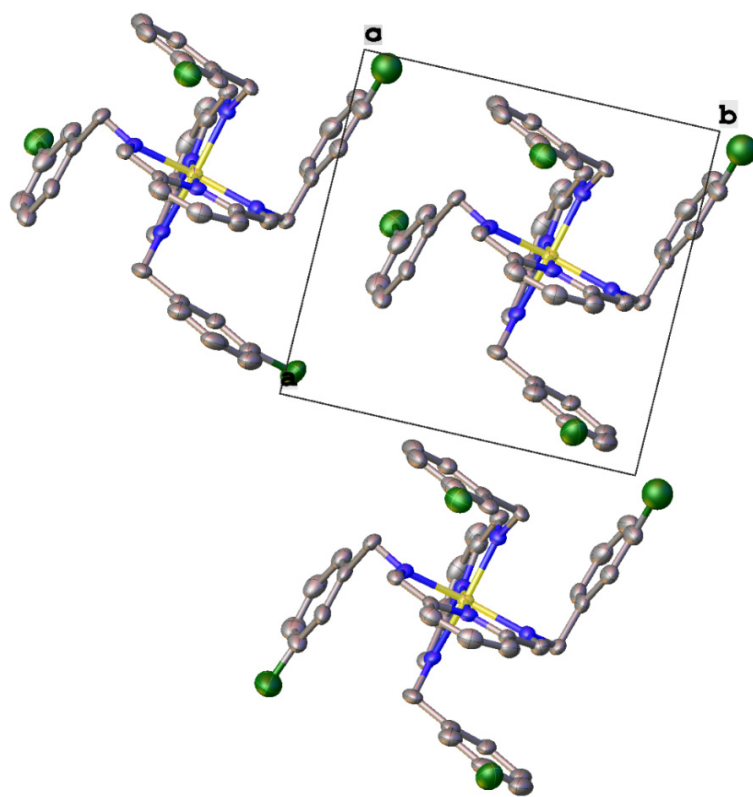

(b)

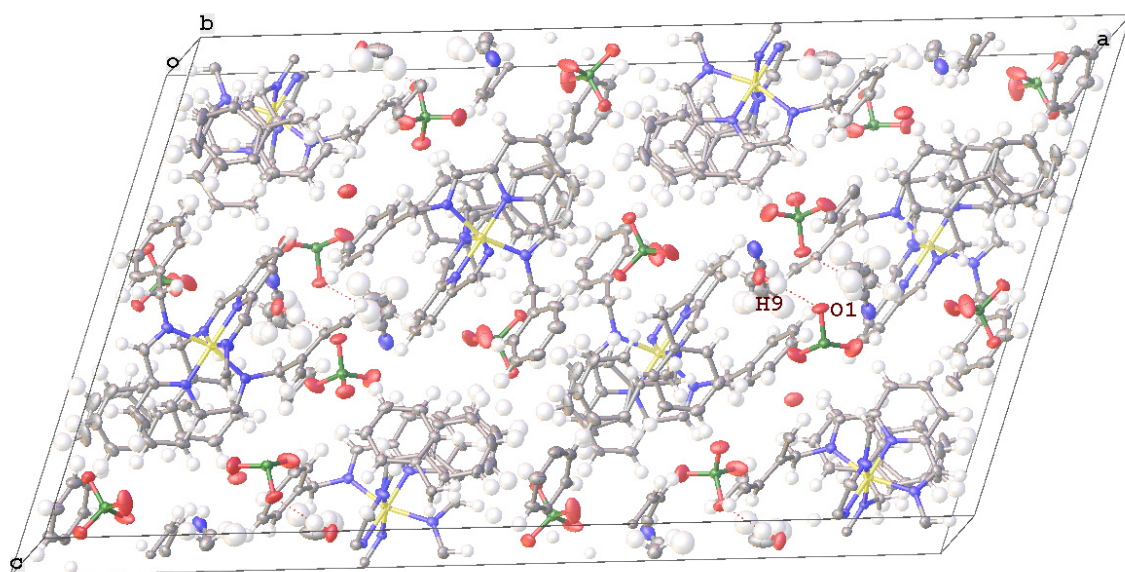

(c)

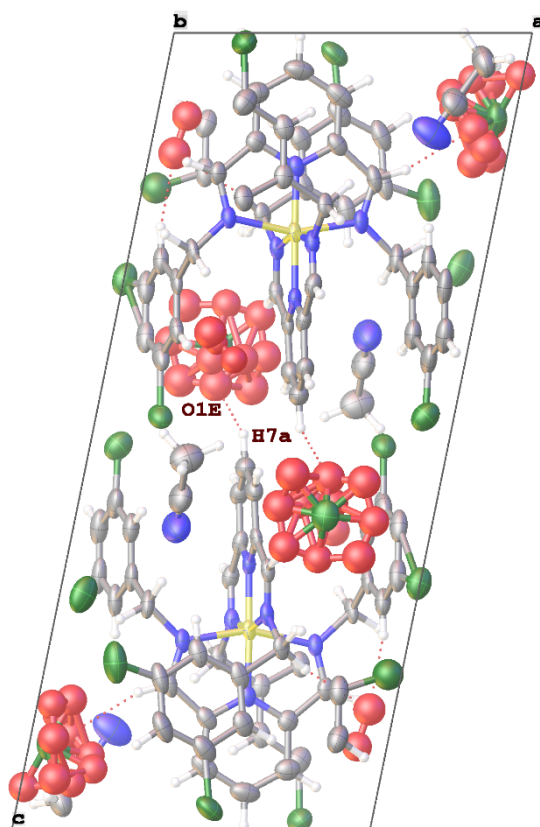

(d)

**Figure S2.** Projection of the  $\pi$ - $\pi$  interaction through phenyl rings of **1** (a) along the bc plane and **2** (b) along the ab plane.  $\text{ClO}_4^-$  ions, solvents and hydrogen atoms have been omitted for clarity. Short intermolecular contacts and H-bonding **1** (c) and **2** (d) both in b-direction.

**Table S3.** Coordination bond angles for **1** and **2** at 120 K.

| N–Fe1–N bond angles (°) at 120 K |           |                 |           |
|----------------------------------|-----------|-----------------|-----------|
| <b>1</b>                         |           | <b>2</b>        |           |
| N(2)–Fe(1)–N(5)                  | 178.92(6) | N(5)–Fe(1)–N(5) | 178.8(2)  |
| N(2)–Fe(1)–N(3)                  | 79.61(6)  | N(5)–Fe(1)–N(4) | 79.2(2)   |
| N(5)–Fe(1)–N(3)                  | 101.48(6) | N(2)–Fe(1)–N(4) | 99.6(2)   |
| N(2)–Fe(1)–N(4)                  | 100.43(6) | N(2)–Fe(1)–N(3) | 79.6(2)   |
| N(5)–Fe(1)–N(4)                  | 79.54(6)  | N(5)–Fe(1)–N(3) | 100.2(2)  |
| N(3)–Fe(1)–N(4)                  | 91.08(6)  | N(4)–Fe(1)–N(6) | 158.5(2)  |
| N(2)–Fe(1)–N(6)                  | 100.44(6) | N(5)–Fe(1)–N(1) | 100.7(2)  |
| N(5)–Fe(1)–N(6)                  | 79.61(6)  | N(5)–Fe(1)–N(6) | 79.3(2)   |
| N(3)–Fe(1)–N(6)                  | 91.68(6)  | N(3)–Fe(1)–N(6) | 91.68(19) |
| N(4)–Fe(1)–N(6)                  | 159.10(6) | N(4)–Fe(1)–N(1) | 92.01(19) |
| N(2)–Fe(1)–N(1)                  | 79.61(6)  | N(2)–Fe(1)–N(6) | 101.9(19) |
| N(5)–Fe(1)–N(1)                  | 99.31(6)  | N(2)–Fe(1)–N(1) | 79.6(2)   |
| N(3)–Fe(1)–N(1)                  | 159.21(6) | N(4)–Fe(1)–N(3) | 91.87(19) |
| N(4)–Fe(1)–N(1)                  | 92.57(6)  | N(6)–Fe(1)–N(1) | 92.17(19) |
| N(6)–Fe(1)–N(1)                  | 92.16(7)  | N(3)–Fe(1)–N(1) | 159.2(2)  |

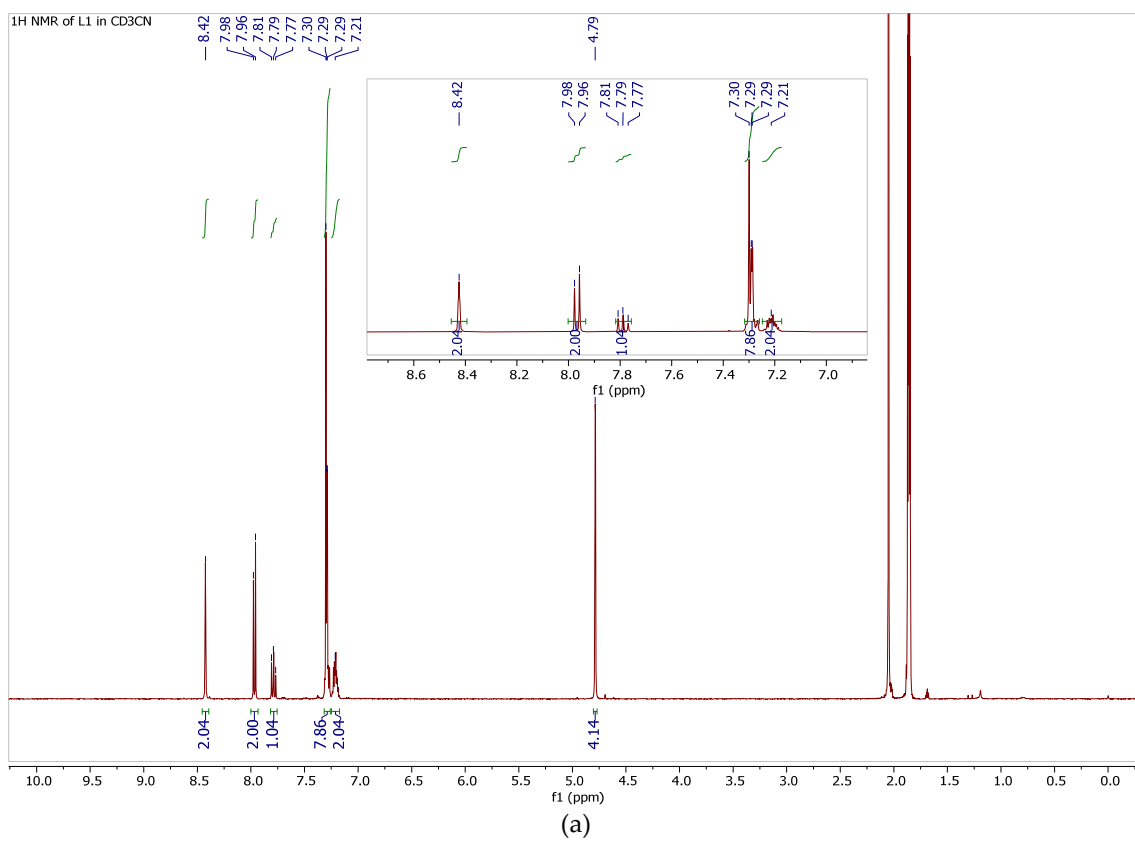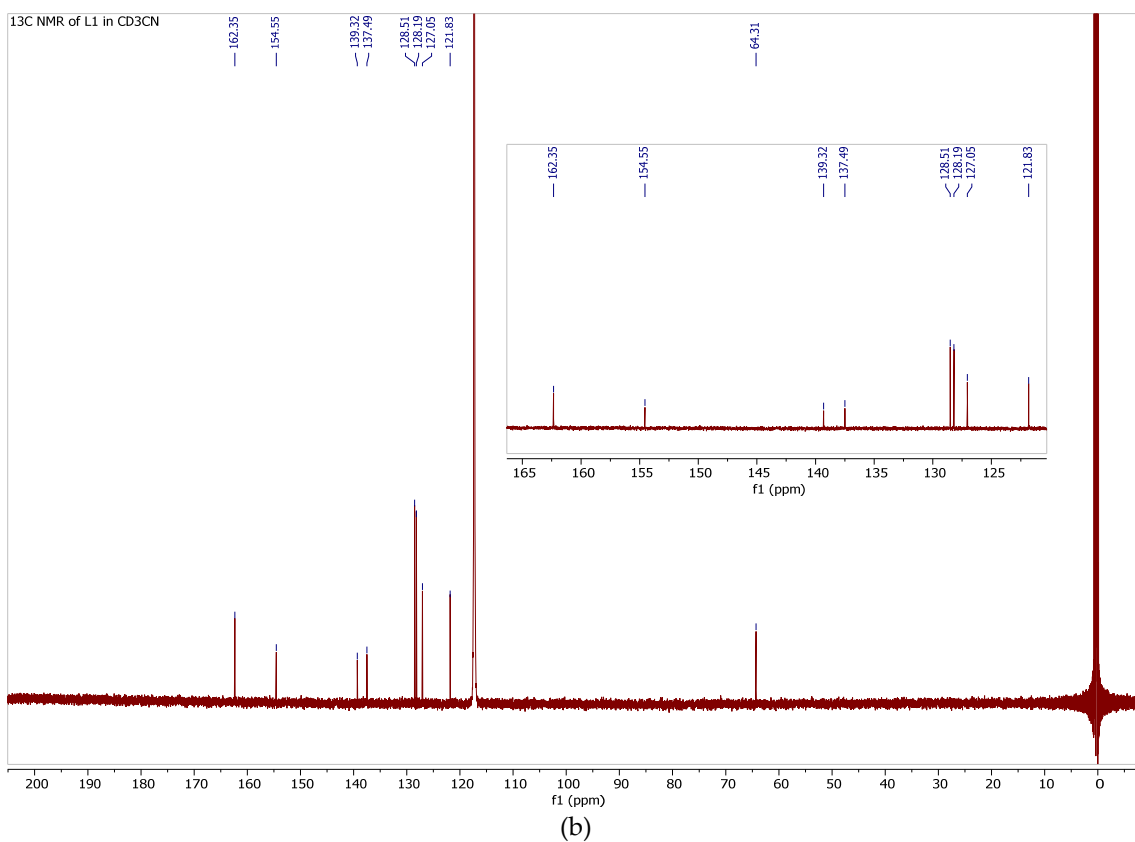

Figure S3. (a) <sup>1</sup>H NMR and (b) <sup>13</sup>C NMR of L<sup>1</sup>.



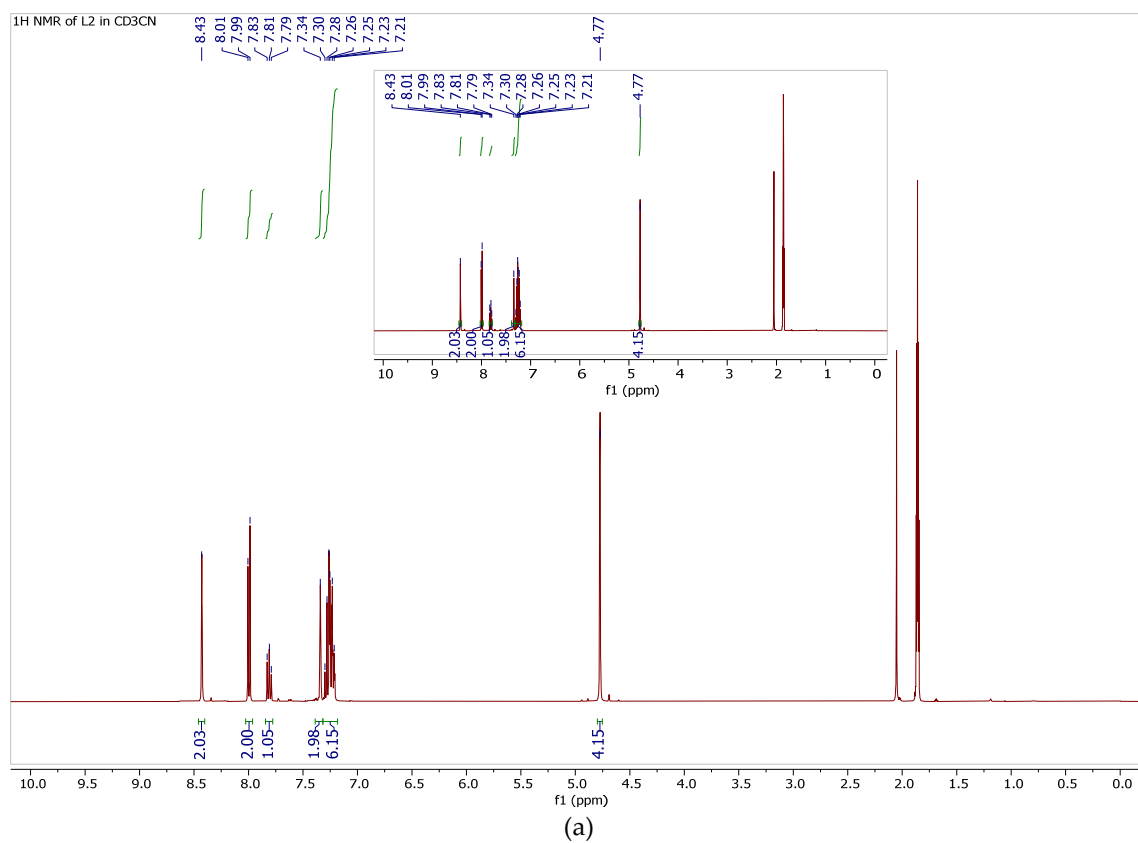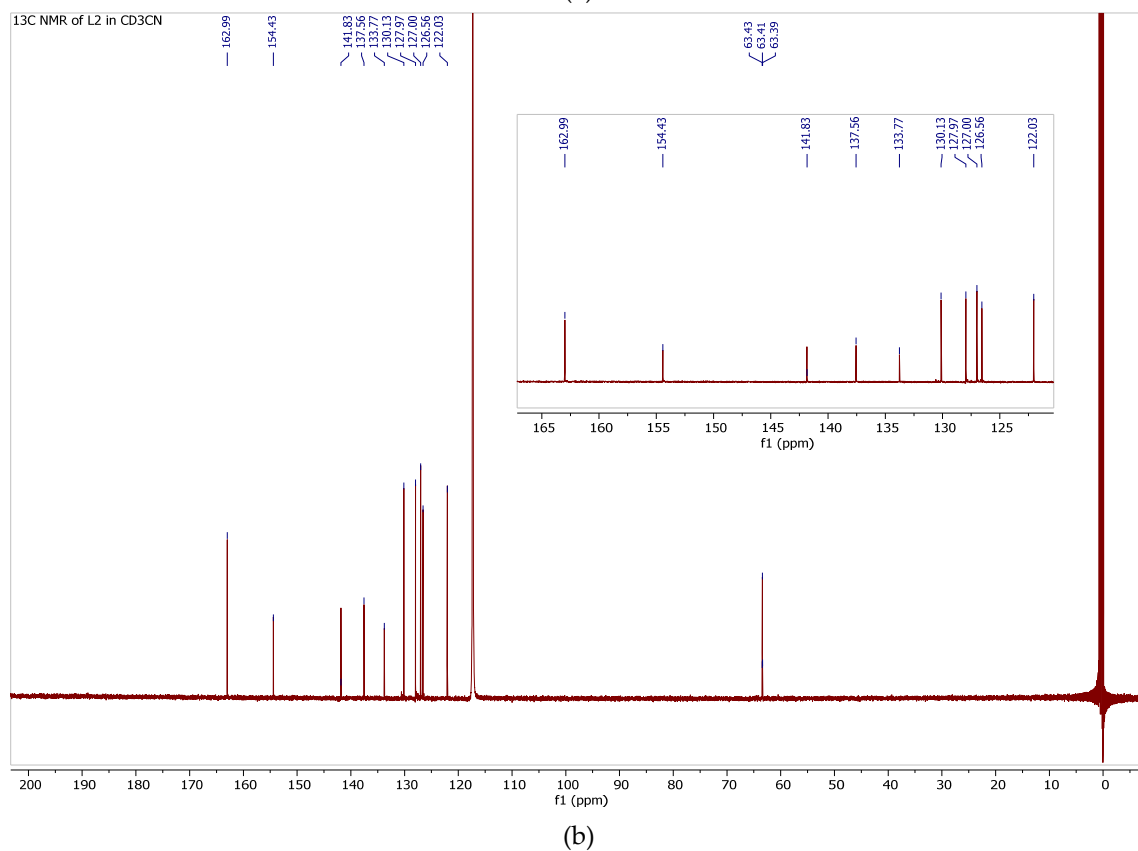

**Figure S4.** (a) <sup>1</sup>H NMR and (b) <sup>13</sup>C NMR of L<sup>2</sup>.

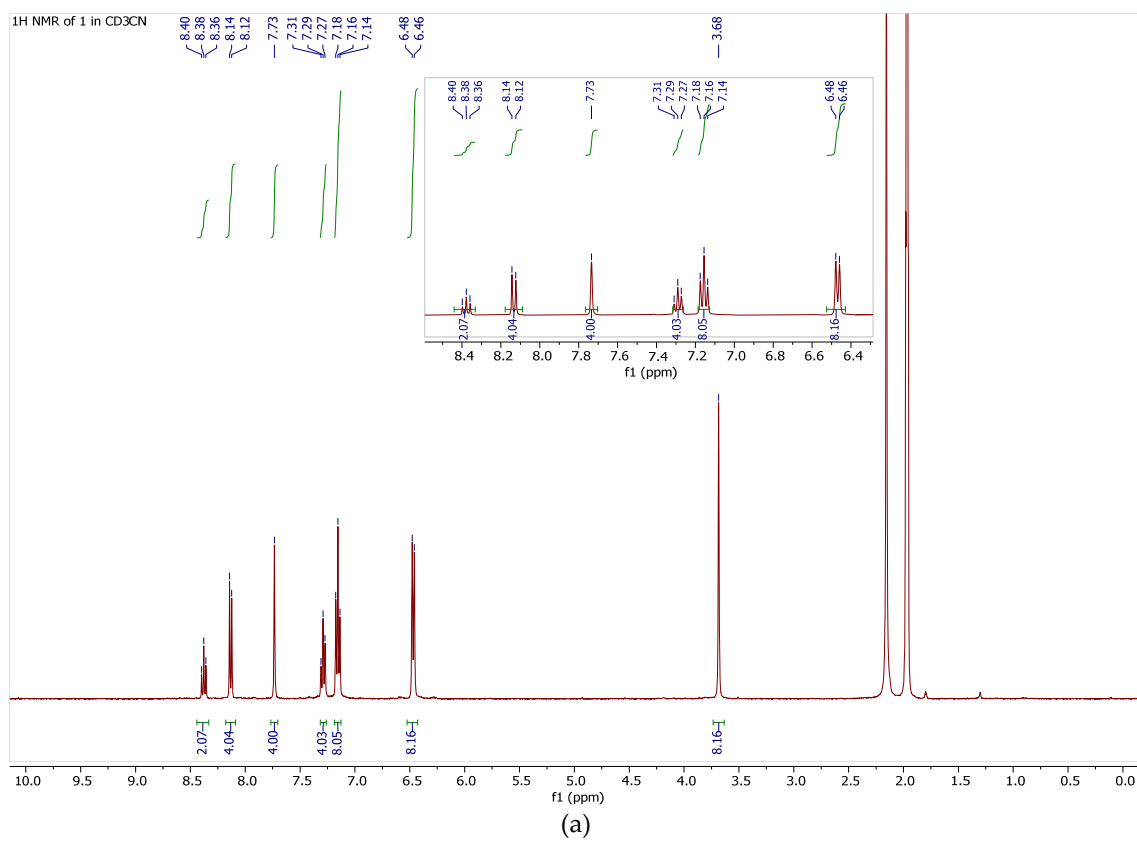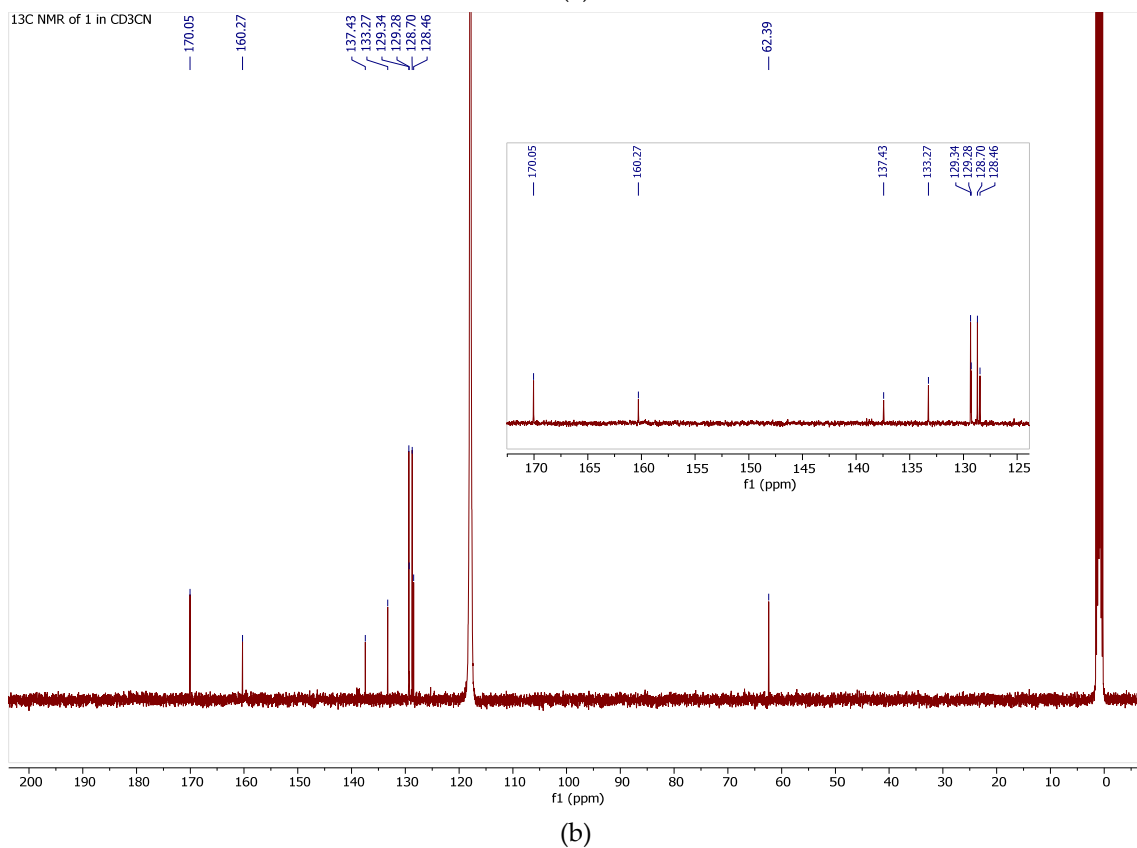

Figure S5. (a) <sup>1</sup>H NMR and (b) <sup>13</sup>C NMR of 1.

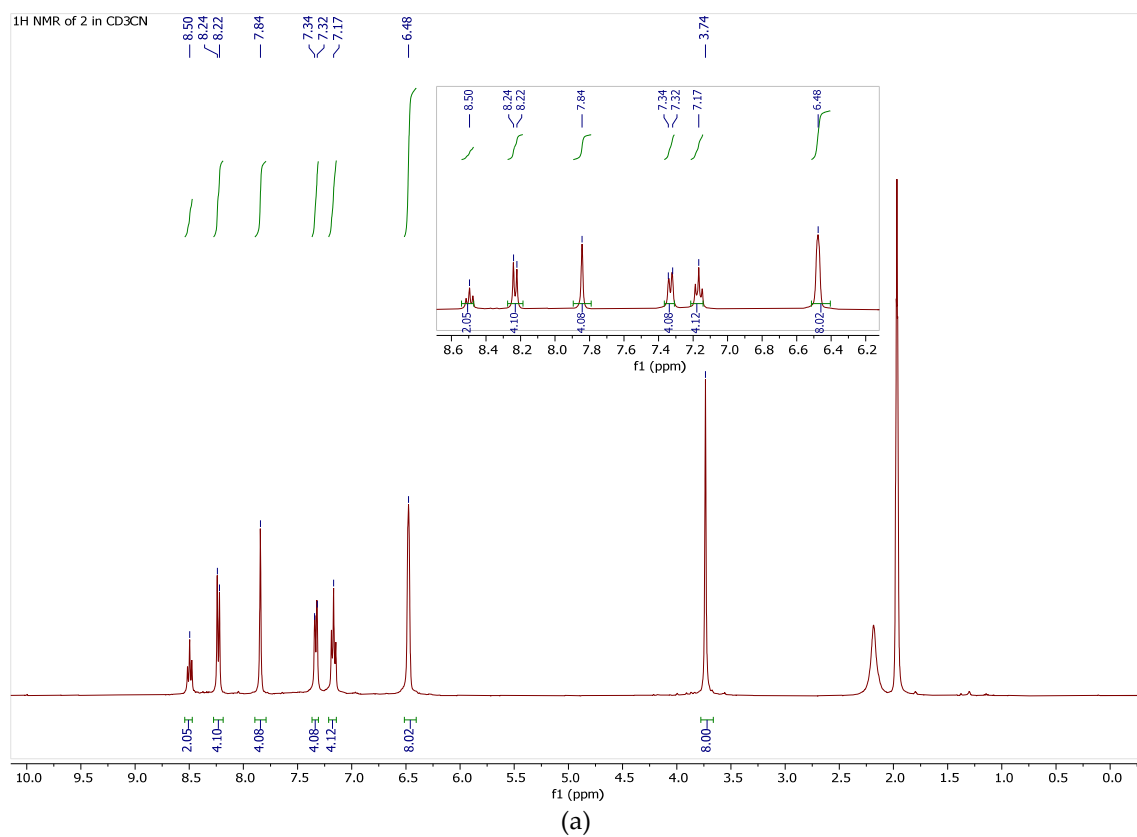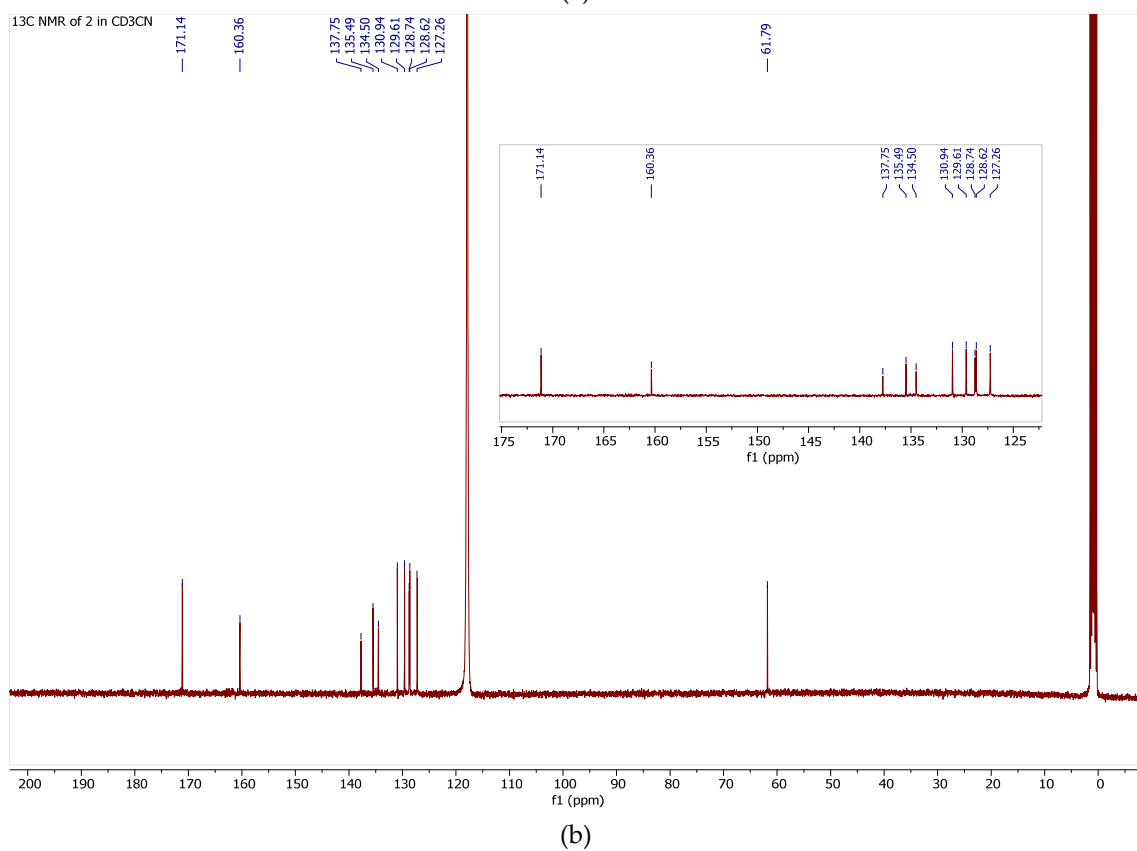

Figure S6. (a) <sup>1</sup>H NMR and (b) <sup>13</sup>C NMR of 2.

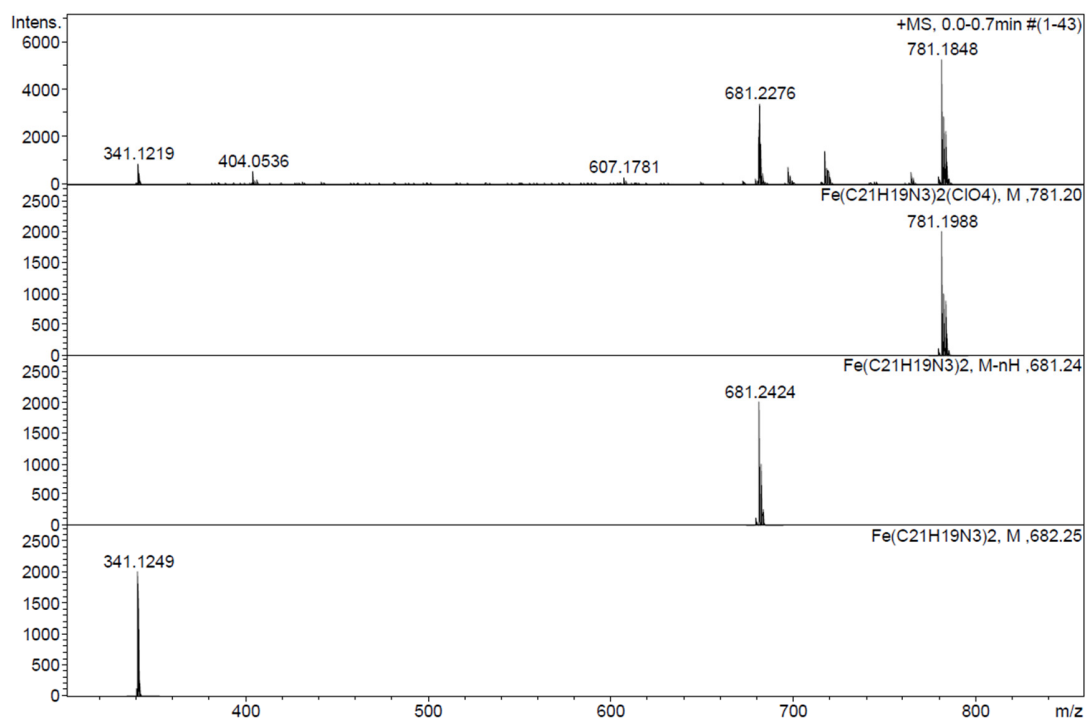

(a)

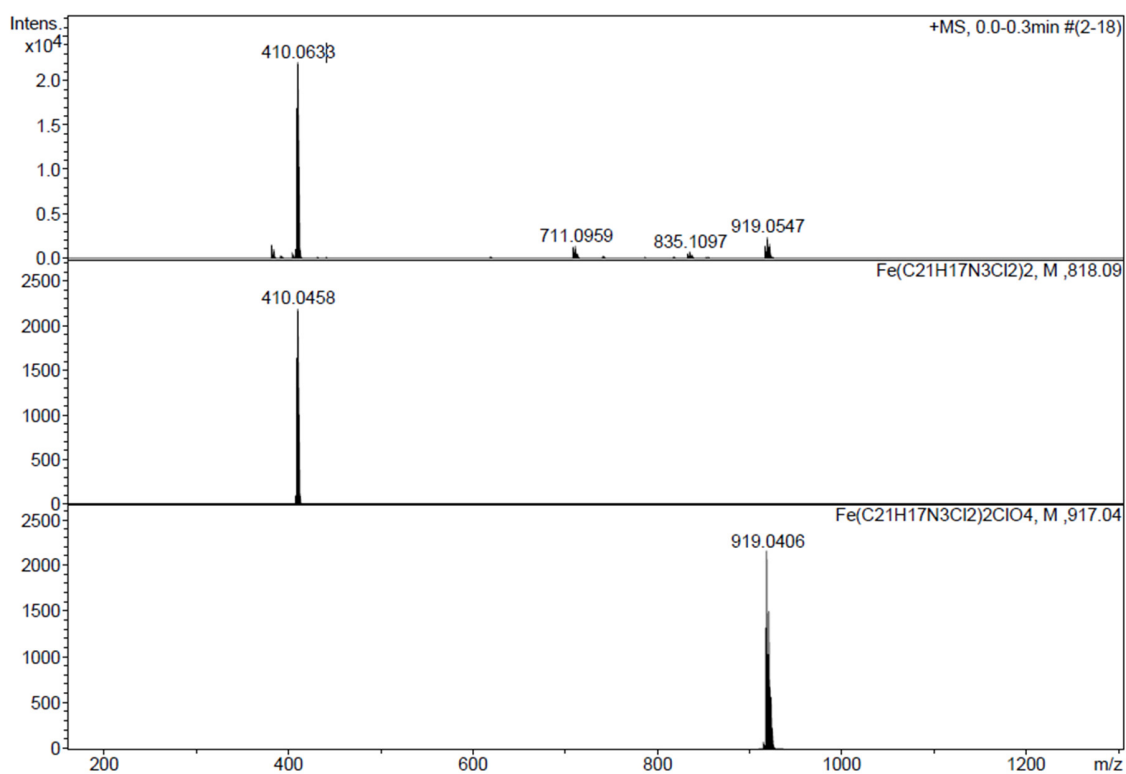

(b)

**Figure S7.** ESI-MS molecular ion peaks of **1** (a) and **2** (b).

DFT optimized Cartesian coordinates of ligands (L<sup>1</sup>, L<sup>2</sup>) and their Fe(II) complexes ([Fe(L<sup>1</sup>)<sub>2</sub>]<sup>2+</sup>, [Fe(L<sup>2</sup>)<sub>2</sub>]<sup>2+</sup>) in S=0 and S=2 spin-states

TPSSh-D3(BJ)/def2-TZVP results *in vacuo*

|                        |          |          |          |                        |          |          |          |
|------------------------|----------|----------|----------|------------------------|----------|----------|----------|
| <b>L<sup>1</sup></b>   |          |          |          | C                      | -4.67521 | 3.14653  | 0.12667  |
| 43                     |          |          |          | H                      | -3.65490 | 3.02713  | 0.47016  |
| Energy=-976.3794439730 |          |          |          | H                      | 8.32788  | -3.54903 | -1.06339 |
| N                      | 3.48472  | -0.56867 | 0.16722  | C                      | -6.64848 | 4.51182  | -0.12515 |
| N                      | 0.00000  | 0.00000  | -0.23258 | H                      | -7.16237 | 5.45590  | 0.01372  |
| N                      | -3.48472 | 0.56867  | 0.16722  | C                      | -5.33527 | 4.35883  | 0.30447  |
| C                      | 1.13390  | -0.18299 | 0.45708  | H                      | -4.82066 | 5.18505  | 0.78175  |
| C                      | 6.64275  | -2.23095 | -0.90231 | H                      | -8.32788 | 3.54903  | -1.06339 |
| H                      | 7.15958  | -1.39756 | -1.36808 | <b>L<sup>2</sup></b>   |          |          |          |
| C                      | 4.61327  | -0.75607 | -0.72154 | 43                     |          |          |          |
| H                      | 5.32033  | 0.05819  | -0.53051 | Energy=-1895.641815306 |          |          |          |
| H                      | 4.31292  | -0.68849 | -1.77998 | N                      | 3.48013  | -0.59452 | 0.17739  |
| C                      | -1.13390 | 0.18299  | 0.45708  | N                      | 0.00000  | 0.00000  | -0.22071 |
| C                      | 5.32204  | -2.07217 | -0.48009 | N                      | -3.48013 | 0.59452  | 0.17739  |
| C                      | 2.34392  | -0.38360 | -0.35808 | C                      | 1.13280  | -0.18869 | 0.46899  |
| H                      | 2.17548  | -0.36228 | -1.44307 | C                      | 6.62366  | -2.24798 | -0.95523 |
| C                      | -6.64275 | 2.23095  | -0.90231 | H                      | 7.12489  | -1.43773 | -1.47152 |
| H                      | -7.15958 | 1.39756  | -1.36808 | C                      | 4.60817  | -0.77570 | -0.71216 |
| C                      | 4.67521  | -3.14653 | 0.12667  | H                      | 5.31044  | 0.04326  | -0.52316 |
| H                      | 3.65490  | -3.02713 | 0.47016  | H                      | 4.30921  | -0.71372 | -1.77096 |
| C                      | -5.32204 | 2.07217  | -0.48009 | C                      | -1.13280 | 0.18869  | 0.46899  |
| C                      | -2.34392 | 0.38360  | -0.35808 | C                      | 5.32595  | -2.08699 | -0.46901 |
| H                      | -2.17548 | 0.36228  | -1.44307 | C                      | 2.34146  | -0.39358 | -0.34702 |
| C                      | 1.18071  | -0.18969 | 1.85357  | H                      | 2.17408  | -0.35970 | -1.43171 |
| H                      | 2.13268  | -0.34224 | 2.34550  | C                      | -6.62366 | 2.24798  | -0.95523 |
| C                      | 7.30174  | -3.44192 | -0.73061 | H                      | -7.12489 | 1.43773  | -1.47152 |
| C                      | 6.64848  | -4.51182 | -0.12515 | C                      | 4.71203  | -3.14349 | 0.19897  |
| H                      | 7.16237  | -5.45590 | 0.01372  | H                      | 3.71034  | -3.01560 | 0.58876  |
| C                      | 0.00000  | 0.00000  | 2.55707  | C                      | -5.32595 | 2.08699  | -0.46901 |
| H                      | 0.00000  | 0.00000  | 3.64084  | C                      | -2.34146 | 0.39358  | -0.34702 |
| C                      | -7.30174 | 3.44192  | -0.73061 | H                      | -2.17408 | 0.35970  | -1.43171 |
| C                      | -1.18071 | 0.18969  | 1.85357  | C                      | 1.17971  | -0.19547 | 1.86549  |
| H                      | -2.13268 | 0.34224  | 2.34550  | H                      | 2.13073  | -0.35194 | 2.35802  |
| C                      | 5.33527  | -4.35883 | 0.30447  | C                      | 7.27992  | -3.45667 | -0.77466 |
| H                      | 4.82066  | -5.18505 | 0.78175  | C                      | 6.67625  | -4.51835 | -0.11062 |
| C                      | -4.61327 | 0.75607  | -0.72154 | H                      | 7.20968  | -5.45032 | 0.02135  |
| H                      | -5.32033 | -0.05819 | -0.53051 | C                      | 0.00000  | 0.00000  | 2.56913  |
| H                      | -4.31292 | 0.68849  | -1.77998 |                        |          |          |          |

|    |          |          |          |
|----|----------|----------|----------|
| H  | 0.00000  | 0.00000  | 3.65284  |
| C  | -7.27992 | 3.45667  | -0.77466 |
| C  | -1.17971 | 0.19547  | 1.86549  |
| H  | -2.13073 | 0.35194  | 2.35802  |
| C  | 5.38631  | -4.34762 | 0.37591  |
| H  | 4.90353  | -5.16451 | 0.89951  |
| C  | -4.60817 | 0.77570  | -0.71216 |
| H  | -5.31044 | -0.04326 | -0.52316 |
| H  | -4.30921 | 0.71372  | -1.77096 |
| C  | -4.71203 | 3.14349  | 0.19897  |
| H  | -3.71034 | 3.01560  | 0.58876  |
| Cl | 8.90084  | -3.64347 | -1.38895 |
| C  | -6.67625 | 4.51835  | -0.11062 |
| H  | -7.20968 | 5.45032  | 0.02135  |
| C  | -5.38631 | 4.34762  | 0.37591  |
| H  | -4.90353 | 5.16451  | 0.89951  |
| Cl | -8.90084 | 3.64347  | -1.38895 |

**[Fe(L<sup>1</sup>)<sub>2</sub>]<sup>2+</sup> (S=0)**

87

Energy=-3216.281344199

|    |          |          |          |
|----|----------|----------|----------|
| Fe | 0.00322  | -0.03493 | 0.00687  |
| N  | 1.86298  | -0.47481 | 0.53070  |
| N  | 0.19697  | 0.12461  | -1.85804 |
| N  | -0.35243 | -1.90634 | -0.54638 |
| N  | -0.20577 | -0.21543 | 1.86743  |
| N  | -1.93157 | 0.36403  | 0.18596  |
| N  | 0.44600  | 1.89246  | -0.14155 |
| C  | 0.45095  | 1.33281  | -2.39599 |
| C  | 0.87116  | -0.48505 | 2.63068  |
| C  | 0.31263  | -3.47971 | 1.24420  |
| C  | -0.78206 | -3.01050 | 0.31705  |
| H  | -1.14131 | -3.83197 | -0.31105 |
| H  | -1.62711 | -2.64777 | 0.90552  |
| C  | 0.07088  | -0.97209 | -2.63117 |
| C  | 3.61511  | 0.71547  | -2.37002 |
| H  | 3.37730  | -0.13516 | -3.00031 |
| C  | 2.99940  | -0.68363 | -0.37214 |
| H  | 2.66760  | -1.36464 | -1.15788 |
| H  | 3.80666  | -1.17488 | 0.17995  |
| C  | -1.43215 | -0.08751 | 2.40963  |

|   |          |          |          |
|---|----------|----------|----------|
| C | 3.47235  | 0.61124  | -0.98861 |
| C | 0.04333  | -3.65963 | 2.59887  |
| H | -0.94802 | -3.44293 | 2.98260  |
| C | 2.04664  | -0.63880 | 1.79760  |
| H | 3.01152  | -0.92154 | 2.20866  |
| C | -0.26232 | -2.12223 | -1.81594 |
| H | -0.47184 | -3.09501 | -2.25145 |
| C | -3.49038 | -1.51111 | -1.54523 |
| H | -3.58766 | -1.76690 | -0.49584 |
| C | 3.80493  | 1.70146  | -0.18351 |
| H | 3.72294  | 1.62470  | 0.89547  |
| C | -3.10069 | -0.22396 | -1.91584 |
| C | -2.39449 | 0.27341  | 1.38775  |
| H | -3.42785 | 0.50869  | 1.62659  |
| C | 0.74868  | -0.62702 | 4.00904  |
| H | 1.61865  | -0.84402 | 4.61464  |
| C | 4.07016  | 1.89852  | -2.94395 |
| C | 0.60858  | 2.32188  | -1.34810 |
| H | 0.89532  | 3.34788  | -1.56143 |
| C | 0.45609  | 0.35900  | -4.58283 |
| H | 0.55647  | 0.45154  | -5.65648 |
| C | 1.03325  | -4.12464 | 3.45861  |
| C | 1.58280  | -3.78505 | 0.75425  |
| H | 1.79795  | -3.67406 | -0.30309 |
| C | 0.20663  | -0.88783 | -4.01298 |
| H | 0.10137  | -1.77253 | -4.62671 |
| C | 4.38060  | 2.98897  | -2.13761 |
| H | 4.74275  | 3.90794  | -2.58199 |
| C | -0.51599 | -0.50822 | 4.58093  |
| H | -0.63835 | -0.62381 | 5.65011  |
| C | -3.76451 | -2.46939 | -2.51362 |
| C | 0.65616  | 2.82614  | 0.96912  |
| H | 1.14112  | 3.72983  | 0.58772  |
| H | 1.34327  | 2.34683  | 1.66864  |
| C | -1.62327 | -0.24169 | 3.77930  |
| H | -2.61157 | -0.13618 | 4.20740  |
| C | 4.25218  | 2.88670  | -0.75364 |
| H | 4.51839  | 3.72470  | -0.12090 |
| C | -2.82845 | 0.83368  | -0.87396 |
| H | -2.34251 | 1.69138  | -1.34301 |
| H | -3.75951 | 1.18807  | -0.42035 |

|   |          |          |          |
|---|----------|----------|----------|
| C | 0.57631  | 1.48580  | -3.77355 |
| H | 0.78101  | 2.46007  | -4.19754 |
| C | 2.30475  | -4.40596 | 2.96866  |
| H | 3.07488  | -4.77433 | 3.63518  |
| C | 2.57682  | -4.24009 | 1.61210  |
| H | 3.55774  | -4.48411 | 1.22226  |
| C | -3.01435 | 0.09857  | -3.26850 |
| H | -2.73243 | 1.10349  | -3.56426 |
| H | 4.19335  | 1.96498  | -4.01824 |
| C | -3.66415 | -2.14401 | -3.86474 |
| H | -3.89280 | -2.88624 | -4.61974 |
| C | -0.74158 | 3.00630  | 3.05289  |
| H | 0.11131  | 2.64684  | 3.61911  |
| C | -0.63856 | 3.15579  | 1.67226  |
| C | -3.29858 | -0.85528 | -4.24025 |
| H | -3.24329 | -0.59023 | -5.28917 |
| C | -1.92584 | 3.32540  | 3.70980  |
| C | -3.01925 | 3.79086  | 2.98660  |
| H | -3.93973 | 4.04643  | 3.49699  |
| H | -4.07643 | -3.46375 | -2.21728 |
| H | 0.80962  | -4.27593 | 4.50780  |
| C | -1.73098 | 3.64554  | 0.95552  |
| H | -1.65425 | 3.79509  | -0.11636 |
| H | -1.99118 | 3.22117  | 4.78615  |
| C | -2.91783 | 3.95656  | 1.60662  |
| H | -3.75776 | 4.34606  | 1.04398  |

**[Fe(L<sup>1</sup>)<sub>2</sub>]<sup>2+</sup> (S=2)**

87

Energy=-3216.252383354

|    |          |          |          |
|----|----------|----------|----------|
| Fe | -0.00970 | -0.06241 | -0.01394 |
| N  | 1.97281  | -0.63705 | 0.82259  |
| N  | 0.26706  | 0.20750  | -2.09036 |
| N  | -0.44364 | -2.02128 | -0.97164 |
| N  | -0.25791 | -0.19131 | 2.08937  |
| N  | -2.12658 | 0.46844  | 0.40509  |
| N  | 0.58914  | 2.03204  | -0.28628 |
| C  | 0.62531  | 1.40979  | -2.54943 |
| C  | 0.78249  | -0.53285 | 2.85330  |
| C  | 0.25123  | -3.60525 | 0.74450  |
| C  | -0.82755 | -3.23132 | -0.24348 |

|   |          |          |          |
|---|----------|----------|----------|
| H | -1.02764 | -4.04661 | -0.94577 |
| H | -1.75360 | -3.00740 | 0.28875  |
| C | 0.08719  | -0.82159 | -2.92537 |
| C | 3.72061  | 0.53327  | -2.00139 |
| H | 3.50420  | -0.33775 | -2.61114 |
| C | 3.19477  | -0.84413 | 0.04356  |
| H | 2.97134  | -1.59035 | -0.72001 |
| H | 3.98776  | -1.24165 | 0.68574  |
| C | -1.46049 | 0.03845  | 2.62170  |
| C | 3.61792  | 0.44747  | -0.61528 |
| C | -0.01582 | -3.62234 | 2.11105  |
| H | -1.01122 | -3.37856 | 2.46687  |
| C | 2.01532  | -0.77400 | 2.09108  |
| H | 2.92142  | -1.06786 | 2.61989  |
| C | -0.32193 | -2.05662 | -2.24102 |
| H | -0.51605 | -2.95602 | -2.82455 |
| C | -3.78136 | -1.51746 | -1.14459 |
| H | -4.00185 | -1.66778 | -0.09282 |
| C | 3.92620  | 1.56535  | 0.16199  |
| H | 3.87430  | 1.50241  | 1.24394  |
| C | -3.32335 | -0.27480 | -1.58722 |
| C | -2.47373 | 0.42985  | 1.63313  |
| H | -3.47660 | 0.69044  | 1.96924  |
| C | 0.65410  | -0.64727 | 4.23486  |
| H | 1.50641  | -0.91601 | 4.84565  |
| C | 4.11545  | 1.72313  | -2.60610 |
| C | 0.81194  | 2.40113  | -1.49198 |
| H | 1.14851  | 3.40522  | -1.74541 |
| C | 0.63166  | 0.57118  | -4.79061 |
| H | 0.77366  | 0.71308  | -5.85465 |
| C | 0.98094  | -3.96841 | 3.01864  |
| C | 1.52700  | -3.95120 | 0.29398  |
| H | 1.73724  | -3.96909 | -0.77040 |
| C | 0.27242  | -0.68312 | -4.29485 |
| H | 0.12779  | -1.52659 | -4.95748 |
| C | 4.40460  | 2.83880  | -1.82623 |
| H | 4.72397  | 3.76177  | -2.29485 |
| C | -0.59780 | -0.42469 | 4.80281  |
| H | -0.73158 | -0.51664 | 5.87350  |
| C | -3.97362 | -2.55929 | -2.04263 |
| C | 0.76623  | 3.01005  | 0.78880  |

|   |          |          |          |
|---|----------|----------|----------|
| H | 1.23433  | 3.91866  | 0.39624  |
| H | 1.44635  | 2.57018  | 1.52058  |
| C | -1.67607 | -0.08138 | 3.99238  |
| H | -2.65614 | 0.10494  | 4.41245  |
| C | 4.31404  | 2.75620  | -0.43798 |
| H | 4.56427  | 3.61445  | 0.17379  |
| C | -3.11440 | 0.85216  | -0.60388 |
| H | -2.71886 | 1.72602  | -1.12463 |
| H | -4.05494 | 1.14009  | -0.12276 |
| C | 0.80739  | 1.63493  | -3.91521 |
| H | 1.09185  | 2.61559  | -4.27421 |
| C | 2.25564  | -4.29437 | 2.56401  |
| H | 3.02783  | -4.57828 | 3.26874  |
| C | 2.52582  | -4.29094 | 1.19692  |
| H | 3.50814  | -4.57270 | 0.83756  |
| C | -3.07904 | -0.08428 | -2.94489 |
| H | -2.74530 | 0.88506  | -3.29983 |
| H | 4.21235  | 1.77445  | -3.68397 |
| C | -3.71397 | -2.36627 | -3.39799 |
| H | -3.87997 | -3.17246 | -4.10222 |
| C | -0.71509 | 3.15728  | 2.82233  |
| H | 0.12165  | 2.81424  | 3.42224  |
| C | -0.55714 | 3.31919  | 1.44839  |
| C | -3.27505 | -1.12455 | -3.84854 |
| H | -3.10186 | -0.96131 | -4.90569 |
| C | -1.93320 | 3.44503  | 3.43131  |
| C | -3.00553 | 3.89446  | 2.66668  |
| H | -3.95090 | 4.12915  | 3.14056  |
| H | -4.34320 | -3.51547 | -1.69226 |
| H | 0.75821  | -4.00117 | 4.07850  |
| C | -1.63078 | 3.78988  | 0.69089  |
| H | -1.51216 | 3.94503  | -0.37647 |
| H | -2.04060 | 3.33289  | 4.50371  |
| C | -2.84947 | 4.07324  | 1.29373  |
| H | -3.67318 | 4.44939  | 0.69898  |

**[Fe(L<sup>2</sup>)<sub>2</sub>]<sup>2+</sup> (S=0)**

87

Energy=-5054.80772407

|    |          |          |         |
|----|----------|----------|---------|
| Fe | -0.03229 | -0.06379 | 0.04053 |
| N  | 1.81666  | -0.52684 | 0.60946 |

|   |          |          |          |
|---|----------|----------|----------|
| N | 0.15040  | 0.07141  | -1.83013 |
| N | -0.38465 | -1.94935 | -0.49066 |
| N | -0.27218 | -0.21292 | 1.90364  |
| N | -1.96646 | 0.38428  | 0.19037  |
| N | 0.44617  | 1.85771  | -0.13832 |
| C | 0.40552  | 1.27158  | -2.38654 |
| C | 0.78822  | -0.47402 | 2.69211  |
| C | 0.40753  | -3.52166 | 1.22960  |
| C | -0.75821 | -3.06803 | 0.38431  |
| H | -1.14280 | -3.88773 | -0.22938 |
| H | -1.56773 | -2.72348 | 1.02961  |
| C | -0.00758 | -1.02880 | -2.59142 |
| C | 3.47111  | 0.62151  | -2.29852 |
| H | 3.18354  | -0.21715 | -2.92091 |
| C | 2.97027  | -0.76095 | -0.26634 |
| H | 2.65730  | -1.46952 | -1.03383 |
| H | 3.77345  | -1.22401 | 0.31441  |
| C | -1.50643 | -0.06680 | 2.42491  |
| C | 3.43538  | 0.52229  | -0.91161 |
| C | 0.27801  | -3.55780 | 2.61366  |
| H | -0.65448 | -3.27918 | 3.08880  |
| C | 1.97626  | -0.66019 | 1.88308  |
| H | 2.93039  | -0.94411 | 2.31834  |
| C | -0.31942 | -2.17335 | -1.76024 |
| H | -0.52469 | -3.15309 | -2.18301 |
| C | -3.29622 | -1.43092 | -1.68805 |
| H | -3.30052 | -1.78379 | -0.66510 |
| C | 3.83517  | 1.60702  | -0.13082 |
| H | 3.83416  | 1.52999  | 0.95068  |
| C | -3.07392 | -0.08832 | -1.98027 |
| C | -2.44687 | 0.30280  | 1.38678  |
| H | -3.47878 | 0.55838  | 1.61159  |
| C | 0.64319  | -0.58173 | 4.07223  |
| H | 1.50031  | -0.78993 | 4.69846  |
| C | 3.88196  | 1.81053  | -2.89316 |
| C | 0.59476  | 2.26954  | -1.35324 |
| H | 0.88915  | 3.28952  | -1.58469 |
| C | 0.34893  | 0.28001  | -4.56384 |
| H | 0.43340  | 0.36197  | -5.63946 |
| C | 1.35734  | -3.95515 | 3.39661  |
| C | 1.60884  | -3.91297 | 0.63825  |



|    |          |          |          |
|----|----------|----------|----------|
| H  | 1.71127  | -3.91285 | -0.44116 |
| C  | 0.09475  | -0.95779 | -3.97710 |
| H  | -0.03226 | -1.84729 | -4.57966 |
| C  | 4.26640  | 2.90286  | -2.12284 |
| H  | 4.59330  | 3.81624  | -2.60219 |
| C  | -0.63060 | -0.45154 | 4.61983  |
| H  | -0.77162 | -0.54438 | 5.68843  |
| C  | -3.49550 | -2.33640 | -2.72267 |
| C  | 0.67617  | 2.80809  | 0.95499  |
| H  | 1.17241  | 3.69836  | 0.55798  |
| H  | 1.35477  | 2.33145  | 1.66373  |
| C  | -1.72322 | -0.19959 | 3.79334  |
| H  | -2.71694 | -0.08104 | 4.20444  |
| C  | 4.24869  | 2.78749  | -0.73544 |
| H  | 4.57329  | 3.62413  | -0.12887 |
| C  | -2.83608 | 0.90422  | -0.86940 |
| H  | -2.34256 | 1.78970  | -1.27546 |
| H  | -3.78271 | 1.23130  | -0.42718 |
| C  | 0.50086  | 1.41209  | -3.76786 |
| H  | 0.71388  | 2.37757  | -4.20671 |
| C  | 2.56489  | -4.32966 | 2.81702  |
| H  | 3.39080  | -4.64579 | 3.44054  |
| C  | 2.67777  | -4.31532 | 1.42949  |
| H  | 3.60556  | -4.63259 | 0.96911  |
| C  | -3.10585 | 0.34199  | -3.30540 |
| H  | -2.94889 | 1.38902  | -3.53846 |
| Cl | 3.89829  | 1.92615  | -4.62161 |
| C  | -3.53071 | -1.91756 | -4.04919 |
| H  | -3.70770 | -2.63422 | -4.84036 |
| C  | -0.75209 | 2.94738  | 3.01301  |
| H  | 0.06461  | 2.52975  | 3.58875  |
| C  | -0.61697 | 3.16895  | 1.64668  |
| C  | -3.34957 | -0.56750 | -4.32926 |
| H  | -3.39225 | -0.22750 | -5.35660 |
| C  | -1.94712 | 3.26979  | 3.64844  |
| C  | -3.01175 | 3.81599  | 2.93997  |
| H  | -3.93123 | 4.06827  | 3.45165  |
| Cl | -3.67411 | -4.01921 | -2.34069 |
| Cl | 1.18794  | -3.96224 | 5.12056  |
| C  | -1.67260 | 3.73536  | 0.93202  |
| H  | -1.56584 | 3.94055  | -0.12748 |

|    |          |         |         |
|----|----------|---------|---------|
| Cl | -2.10617 | 2.96992 | 5.34698 |
| C  | -2.86069 | 4.05528 | 1.57693 |
| H  | -3.67483 | 4.50759 | 1.02380 |

**[Fe(L<sup>2</sup>)<sub>2</sub>]<sup>2+</sup> (S=2)**

87

Energy=-5054.772987622

|    |          |          |          |
|----|----------|----------|----------|
| Fe | 0.00207  | -0.04870 | -0.02106 |
| N  | 1.97871  | -0.62672 | 0.83588  |
| N  | 0.25548  | 0.20537  | -2.09984 |
| N  | -0.42170 | -2.02930 | -0.96390 |
| N  | -0.27465 | -0.19063 | 2.07138  |
| N  | -2.11769 | 0.50913  | 0.37310  |
| N  | 0.59928  | 2.04407  | -0.31045 |
| C  | 0.60635  | 1.40721  | -2.57113 |
| C  | 0.75452  | -0.53934 | 2.84907  |
| C  | 0.27685  | -3.61072 | 0.75586  |
| C  | -0.80106 | -3.24025 | -0.23477 |
| H  | -0.99699 | -4.05959 | -0.93281 |
| H  | -1.73006 | -3.02330 | 0.29506  |
| C  | 0.07151  | -0.82765 | -2.92789 |
| C  | 3.68922  | 0.52399  | -1.99079 |
| H  | 3.46214  | -0.34447 | -2.59711 |
| C  | 3.21288  | -0.82749 | 0.07494  |
| H  | 3.01164  | -1.59091 | -0.67751 |
| H  | 4.00727  | -1.19737 | 0.73152  |
| C  | -1.48299 | 0.04006  | 2.59192  |
| C  | 3.62374  | 0.45891  | -0.60221 |
| C  | -0.00454 | -3.62434 | 2.11861  |
| H  | -0.99686 | -3.38576 | 2.48108  |
| C  | 1.99911  | -0.77229 | 2.10452  |
| H  | 2.89764  | -1.06508 | 2.64725  |
| C  | -0.32048 | -2.06340 | -2.23522 |
| H  | -0.51967 | -2.96412 | -2.81543 |
| C  | -3.67834 | -1.47710 | -1.16504 |
| H  | -3.83434 | -1.65553 | -0.10809 |
| C  | 3.95005  | 1.58318  | 0.15697  |
| H  | 3.92636  | 1.53184  | 1.23980  |
| C  | -3.30529 | -0.21594 | -1.62892 |
| C  | -2.48098 | 0.44947  | 1.59650  |
| H  | -3.48837 | 0.70484  | 1.92380  |

|    |          |          |          |
|----|----------|----------|----------|
| C  | 0.60858  | -0.65998 | 4.22822  |
| H  | 1.45085  | -0.93329 | 4.84964  |
| C  | 4.07094  | 1.71269  | -2.60582 |
| C  | 0.80082  | 2.40585  | -1.52280 |
| H  | 1.12422  | 3.41124  | -1.78893 |
| C  | 0.59511  | 0.55492  | -4.80698 |
| H  | 0.73412  | 0.69081  | -5.87195 |
| C  | 0.99500  | -3.97226 | 3.02245  |
| C  | 1.55437  | -3.95492 | 0.31141  |
| H  | 1.77088  | -3.97513 | -0.75090 |
| C  | 0.24322  | -0.69591 | -4.30080 |
| H  | 0.09745  | -1.54445 | -4.95675 |
| C  | 4.38249  | 2.84275  | -1.85669 |
| H  | 4.69023  | 3.75399  | -2.35262 |
| C  | -0.65110 | -0.44169 | 4.78074  |
| H  | -0.79909 | -0.54084 | 5.84840  |
| C  | -3.85348 | -2.51906 | -2.06570 |
| C  | 0.78246  | 3.03206  | 0.75481  |
| H  | 1.23268  | 3.94431  | 0.35051  |
| H  | 1.47660  | 2.60564  | 1.48081  |
| C  | -1.71797 | -0.09304 | 3.95884  |
| H  | -2.70180 | 0.09208  | 4.36888  |
| C  | 4.32486  | 2.76560  | -0.46801 |
| H  | 4.59277  | 3.63243  | 0.12366  |
| C  | -3.09195 | 0.90806  | -0.64193 |
| H  | -2.68414 | 1.77698  | -1.16101 |
| H  | -4.03495 | 1.20458  | -0.17048 |
| C  | 0.77405  | 1.62539  | -3.93930 |
| H  | 1.05648  | 2.60234  | -4.30831 |
| C  | 2.27650  | -4.29848 | 2.58872  |
| H  | 3.03585  | -4.57994 | 3.30649  |
| C  | 2.54570  | -4.29439 | 1.22313  |
| H  | 3.53160  | -4.57749 | 0.87513  |
| C  | -3.13905 | -0.00677 | -2.99513 |
| H  | -2.86306 | 0.97548  | -3.36155 |
| Cl | 4.16775  | 1.77788  | -4.33561 |
| C  | -3.68718 | -2.31955 | -3.43435 |
| H  | -3.84718 | -3.13815 | -4.12381 |
| C  | -0.68312 | 3.11359  | 2.79484  |
| H  | 0.14313  | 2.73997  | 3.38772  |
| C  | -0.53584 | 3.33323  | 1.42898  |

|    |          |          |          |
|----|----------|----------|----------|
| C  | -3.33954 | -1.05312 | -3.89104 |
| H  | -3.23164 | -0.88305 | -4.95555 |
| C  | -1.90111 | 3.38991  | 3.40914  |
| C  | -2.97955 | 3.88033  | 2.68003  |
| H  | -3.91540 | 4.09966  | 3.17711  |
| Cl | -4.27045 | -4.09179 | -1.47053 |
| Cl | 0.62928  | -4.01218 | 4.71615  |
| C  | -1.60691 | 3.84256  | 0.69433  |
| H  | -1.49215 | 4.04052  | -0.36568 |
| Cl | -2.06944 | 3.11847  | 5.11262  |
| C  | -2.81859 | 4.11269  | 1.31722  |
| H  | -3.64409 | 4.52140  | 0.74719  |
